# Supplementary material for: EPR-derived structures of flavin radical and iron-sulfur clusters from Methylosinus sporium 5 reductase
Source: Royal Society of Chemistry journal article supplement (doi:10.1039/d0qi01334j), 2021-01-01
Supplement: d0qi01334j1.pdf [file d0qi01334j1.pdf]

# Electronic Supporting Information

EPR-derived structures of flavin radical and iron-sulfur cluster from  
*Methylosinus sporium* 5 reductase

Han Sol Jeong,<sup>ab†</sup> Sugyeong Hong,<sup>ab†</sup> Hee Seon Yoo,<sup>c</sup> Jin Kim,<sup>d</sup> Yujeong Kim,<sup>ab</sup>  
Chungwoon Yoon,<sup>c</sup> Seung Jae Lee<sup>c\*</sup> and Sun Hee Kim<sup>ab\*</sup>

<sup>a</sup>Western Seoul Center, Korea Basic Science Institute (KBSI), Seoul 03759, Rep. of Korea. E-mail: shkim7@kbsi.re.kr

<sup>b</sup>Department of Chemistry and Nano Science, Ewha Womans University, Seoul 03760, Republic of Korea.

<sup>c</sup>Department of Chemistry and Institute of Molecular Biology and Genetics, Jeonbuk National University, Jeonju 54896, Republic of Korea. E-mail: slee026@jbnu.ac.kr

<sup>d</sup>Department of Chemistry, Sunchon National University, Suncheon 57922, Republic of Korea

<sup>†</sup>These authors contributed equally to this work.

## Supplementary Schemes

**Scheme S1.** Alignment of amino acids from ferredoxin domain of sMMO. Gray and red color represent identical and different amino acids, respectively.

|                                        | Identity / Similarity |                                                                                                                                                                                                                                                                   |
|----------------------------------------|-----------------------|-------------------------------------------------------------------------------------------------------------------------------------------------------------------------------------------------------------------------------------------------------------------|
| <i>Methylosinus sporium</i> 5          | 001                   | MYQIV <sup>080</sup> VIETEDGETCSFECG <sup>081</sup> PS <sup>082</sup> EDVISAGLRQSVILLASCRAGGCATCKADCTDGEYELIDVKVQALPPDEEEDGKVL <sup>083</sup> LCR <sup>084</sup>                                                                                                  |
| <i>Methylocystis species</i> M         | 96% / 98%             | 001 MYQIV <sup>080</sup> VIETEDGETCSFECG <sup>081</sup> PS <sup>082</sup> EDVISAGLRQSVILLASCRAGGCATCKADCTDGEYELIDVKVQALPPDEEEDGKVL <sup>083</sup> LCR <sup>084</sup>                                                                                              |
| <i>Methylosinus trichosporium</i> OB3b | 81% / 85%             | 001 MYQIV <sup>080</sup> VIETEDGETCR-RMRPSEDWISRAEAERN-LLASCRAG-CATCKADCTDGEYELIDVKVQAVPPDEEEDGKVL <sup>083</sup> LCR <sup>084</sup>                                                                                                                              |
| <i>Methylococcus capsulatus</i> Bath   | 58% / 78%             | 004 VHTITAVTEDGESLRFECRSDE <sup>085</sup> VITAAALRQNI <sup>086</sup> FLMSSCREGGCATCKALCSEGDYDLKGC <sup>087</sup> SVQALPPEEEEEGLV <sup>088</sup> LCR <sup>089</sup>                                                                                                |
| <i>Methylovulum miyakonense</i> HT12   | 53% / 73%             | 005 -HQV <sup>090</sup> TI <sup>091</sup> V <sup>092</sup> TEDHESITFD <sup>093</sup> CRSDE <sup>094</sup> VITAAV <sup>095</sup> RQDIY <sup>096</sup> LMSSCREGGCATCKGVCSEGDYVIGK <sup>097</sup> VSAQALPSQEEEE <sup>098</sup> GMV <sup>099</sup> LCR <sup>100</sup> |
|                                        |                       | 081 TFPRSDLHLIVPYTYD <sup>096</sup>                                                                                                                                                                                                                               |
|                                        |                       | 081 TFPRSDLHVVVPYTYD <sup>096</sup>                                                                                                                                                                                                                               |
|                                        |                       | 078 TFPRSDLHLLVPYTYD <sup>093</sup>                                                                                                                                                                                                                               |
|                                        |                       | 084 TYPKTDLELELPYTHC <sup>099</sup>                                                                                                                                                                                                                               |
|                                        |                       | 084 CYP <sup>100</sup> TTDIEVEVPYTYE <sup>101</sup>                                                                                                                                                                                                               |

**Scheme S2.** Alignment of amino acids from FAD binding domain of sMMO. Gray and red color represent identical and different amino acids, respectively.

|                                        | Identity / Similarity |                                                                                                                                                                                                                                                    |
|----------------------------------------|-----------------------|----------------------------------------------------------------------------------------------------------------------------------------------------------------------------------------------------------------------------------------------------|
| <i>Methylosinus sporium</i> 5          | 097                   | RISFEAIQTNWLAEIVECDRVSSNVVRL <sup>175</sup> LQPLTADGAAPISLNFAPGQFVDIEIPGTHTRRSYSMASVAE-DGRLEFFI <sup>176</sup>                                                                                                                                     |
| <i>Methylocystis species</i> M         | 89% / 93%             | 097 RISFQAIQTNWLAEITECDRVSSNVVRLV <sup>175</sup> LQPLTADGAAPISLNFAPGQFVDIEIPGTHTRRSYSMASVAE-DGRLEFFI <sup>176</sup>                                                                                                                                |
| <i>Methylosinus trichosporium</i> OB3b | 78% / 84%             | 094 RISFEAIQTNWLAEILACDRVSSNVVRLV <sup>175</sup> LQ- <sup>176</sup> RSRPM <sup>177</sup> AARISLNFVPGQFVDIEIPGTHTRRSYSMASVAE-DGQLEFI <sup>178</sup>                                                                                                 |
| <i>Methylococcus capsulatus</i> Bath   | 47% / 66%             | 100 RISFGEVGS-FEAEVVLN <sup>175</sup> WVSSNTVQFLLQK- <sup>176</sup> RPDECN <sup>177</sup> RGVKFEPGQFMDLTIPGTDVRSYSANLNP <sup>178</sup> EGRLEFLI <sup>179</sup>                                                                                     |
| <i>Methylovulum miyakonense</i> HT12   | 44% / 66%             | 100 RISFSP <sup>175</sup> EGMDFEAEVVGLEQISIN <sup>176</sup> VVKFQLRR <sup>177</sup> TGDDK----TIKFEAGQFFDLEIPGTE <sup>178</sup> TRRSYSPANISNSQGDLEFLI <sup>179</sup>                                                                                |
|                                        |                       | 176 RLLPDGAFSNYLRTQASV <sup>175</sup> QQRVALRGPAGSFFLH-KSE-RPRFFVAGGTGLSPVLSMIRQLKKEADPQATLFFGVTN <sup>176</sup> YE <sup>177</sup>                                                                                                                 |
|                                        |                       | 176 RLLPDGAFSNYLRTQARV <sup>175</sup> QQRVALRGPAGSFFLH-KSE-RPRFFVAGGTGLSPVLSMIRQLHKE <sup>176</sup> SDPQATLFFGVTN <sup>177</sup> YE <sup>178</sup>                                                                                                 |
|                                        |                       | 172 RLLPDGAFSKFLQTEAKV <sup>175</sup> GM <sup>176</sup> RV <sup>177</sup> DLRGPAGSFFLHDHGG-RSRV <sup>178</sup> FVAGGTGLSPVLSMIRQLGKASDP <sup>179</sup> SATLFFGVTN <sup>180</sup> RE <sup>181</sup>                                                 |
|                                        |                       | 178 RVLPEGRFSDYL <sup>175</sup> RNDARV <sup>176</sup> QVLSVKGPLGVFLKERGM-APRY <sup>177</sup> FVAGGTGLAPV <sup>178</sup> SMV <sup>179</sup> RQM <sup>180</sup> EW <sup>181</sup> TAPNETRIYFGVNT <sup>182</sup> EP <sup>183</sup>                    |
|                                        |                       | 176 RIVDGGK <sup>175</sup> FSEFLKKEAKV <sup>176</sup> QRLKAKG <sup>177</sup> PSGVFGLK-ENGFT <sup>178</sup> PRY <sup>179</sup> FVAGGTGLAPILSMV <sup>180</sup> RHMKEW <sup>181</sup> GE <sup>182</sup> PQKCVIYFGVNT <sup>183</sup> EA <sup>184</sup> |
|                                        |                       | 254 ELFYVEELRALQKAMP <sup>175</sup> SLDVQVAVVNATEANGVAKGTVIDLMRAELEKLRGAPDIYLCGPPGMI <sup>176</sup> EAAFDAAATAGVPKEQ <sup>177</sup>                                                                                                                |
|                                        |                       | 254 ELFYVDELKALQHAMP <sup>175</sup> SLDVQIAVNVSENGVAKGTVIDLQDELGRRAEK <sup>176</sup> PDYIYLCGPPGMI <sup>177</sup> DAFAAASAGVPKEQ <sup>178</sup>                                                                                                    |
|                                        |                       | 251 ELFYVDELKTLAQSMPTL <sup>175</sup> GVRIAVVNDGGNGVDKGTVIDLRAELEKSDAK <sup>176</sup> PDYIYLCGPPGMI <sup>177</sup> EAAFAAATAGVPKEQ <sup>178</sup>                                                                                                  |
|                                        |                       | 257 ELFYIDELKSLERSMRNL <sup>175</sup> TVKACVWHPSGDWEGEGSSPIDALREDESSDAN <sup>176</sup> PDYIYLCGPPGMI <sup>177</sup> DAACELVRSRGI <sup>178</sup> PEQ <sup>179</sup>                                                                                 |
|                                        |                       | 255 EIFHLDLEQLAQMPTLELR <sup>175</sup> NCVWKCSDDW <sup>176</sup> HCEKGSVVDILRRDLVETGAK <sup>177</sup> PDYIYLCGPPGMV <sup>178</sup> DATFVACADLGI <sup>179</sup> PKER <sup>180</sup>                                                                 |
|                                        |                       | 334 VYLEKFLASG <sup>343</sup>                                                                                                                                                                                                                      |
|                                        |                       | 334 VYLEKFLASG <sup>343</sup>                                                                                                                                                                                                                      |
|                                        |                       | 331 VYLEKFLASG <sup>340</sup>                                                                                                                                                                                                                      |
|                                        |                       | 337 VFEKFLPSG <sup>346</sup>                                                                                                                                                                                                                       |
|                                        |                       | 335 IYLEKFLPSG <sup>344</sup>                                                                                                                                                                                                                      |

**Scheme S3.** The schematic drawing of three types of  $[2\text{Fe}-2\text{S}]^+$  clusters. (a) Ferredoxin, (b) MitoNEET, and (c) Rieske-type.

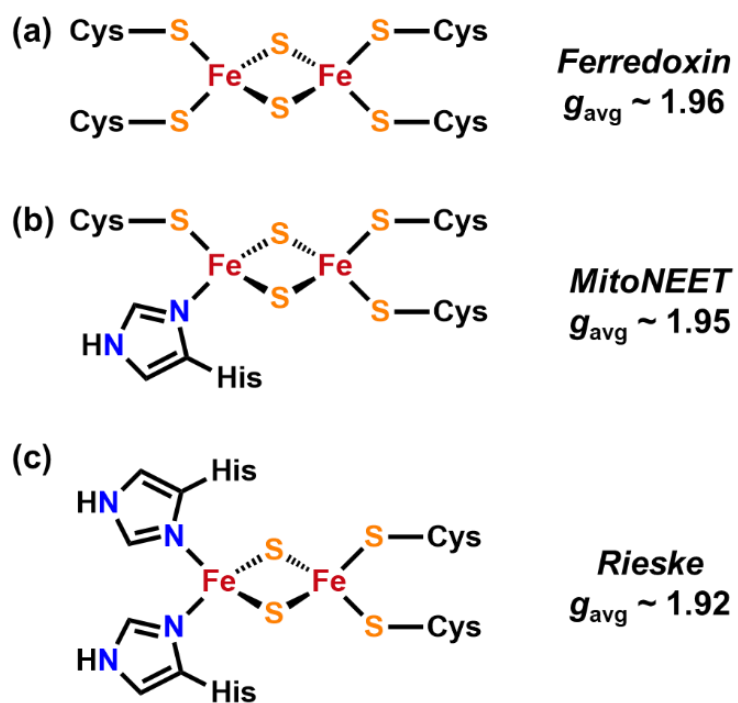

**Scheme S4.** Schematic representation of a proton positioned nearby from the Fe<sup>II</sup> and Fe<sup>III</sup> ions of the [2Fe-2S]<sup>+</sup> cluster.

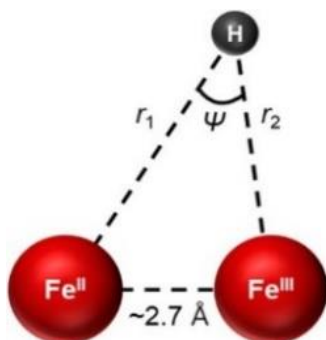

To estimate the position of the proton from the [2Fe-2S]<sup>+</sup> cluster, the dipolar hyperfine coupling value of  $A_{dip}$  is used by considering the spin projection factor of the respective nucleus. The spin projection factors of two metal atoms,  $p_A$  and  $p_B$ , are given as follows:

$$p_A = \frac{S(S+1) + S_A(S_A+1) - S_B(S_B+1)}{2S(S+1)}$$

$$p_B = \frac{S(S+1) - S_A(S_A+1) + S_B(S_B+1)}{2S(S+1)}$$

where  $S$  is total spin of the cluster, and  $S_A$  and  $S_B$  are the local spin of each metal atom.<sup>S1,S2</sup> The spin projection factors of Fe(II) ( $S_A = 2$ ) and Fe(III) ( $S_B = 5/2$ ) of the [2Fe-2S]<sup>+</sup> cluster are  $-4/3$  ( $p_A$ ) and  $+7/3$  ( $p_B$ ), respectively. Thus,  $A_{dip}$  can be calculated by equations as follows:

$$A_{dip} = c \left( -\delta, -\Gamma + \frac{\delta}{2}, \Gamma + \frac{\delta}{2} \right)$$

$$\delta = p_A r_1^{-3} + p_B r_2^{-3}$$

$$\Gamma = \frac{3}{2} \sqrt{p_A^2 r_1^{-6} + p_A p_B r_1^{-3} r_2^{-3} \cos 2\psi + p_B^2 r_2^{-6}}$$

where  $c$  is  $g_e \mu_e g_n \mu_n$  and equals  $79 \text{ MHz } \text{Å}^3$  for a proton, and geometrical parameters  $r$  and  $\psi$  are defined in **Scheme S3**.<sup>S3,S4</sup> From the equation, the distances between the iron ions and the exchangeable proton are estimated to be  $r_1 = 4.1\text{-}4.4$  and  $r_2 = 3.50\text{-}3.60$  Å with  $\psi \sim 40^\circ$ . The distance between the Fe<sup>II</sup> and Fe<sup>III</sup> centers can also be calculated in accordance with the law of cosines and was estimated to be  $\sim 2.7$  Å.<sup>S5</sup>

## Supplementary Tables

**Table S1.** The simulation parameters for  $^1\text{H}$  Davies ENDOR spectra of the  $[\text{2Fe-2S}]^+$  cluster.

|                         | $A(^1\text{H})$ (MHz)                             | $[\alpha, \beta, \lambda]$ ( $^\circ$ ) |
|-------------------------|---------------------------------------------------|-----------------------------------------|
| Exchangeable proton     | $[6.15 \pm 0.35, -3.50 \pm 0.15, -2.90 \pm 0.15]$ | $[30, 90, 50]$                          |
| Non-exchangeable proton | $[2.32 \pm 0.12, 11.70 \pm 0.20, 1.58 \pm 0.08]$  | $[80, 30, 90]$                          |

**Table S2.** Simulation parameters for  $^{14}\text{N}$  three-pulse ESEEM and HYSCORE spectra of the  $[\text{2Fe-2S}]^+$  cluster.

|                                       | $\text{N}_1$    | $\text{N}_2$    |
|---------------------------------------|-----------------|-----------------|
| $A(^{14}\text{N})$ (MHz)              | [1.2, 1.2, 1.2] | [0.9, 0.6, 0.6] |
| $A_{\text{iso}}(^{14}\text{N})$ (MHz) | 1.2             | 0.7             |
| $e^2qQ/h$ (MHz)                       | 3.4             | 3.0             |
| $\eta$                                | 0.4             | 0.9             |
| $[Q_a, Q_b, Q_c]$ ( $^\circ$ )        | [-75, 100, 60]  | [0, 90, 0]      |

**Table S3.** The reported hyperfine and quadrupole coupling parameters of  $^{14}\text{N}$ s coupled to the  $[\text{2Fe-2S}]^+$  cluster.

|                                             | $A_{iso}$ (MHz) | $e^2qQ/h$ (MHz) | Refs. |
|---------------------------------------------|-----------------|-----------------|-------|
| <b>Rieske or Rieske-type</b>                |                 |                 |       |
| bc1 (bovine)                                | 3.55            | 2.25            | S6    |
|                                             | 5.20            | 2.93            |       |
| bc1 (bovine) + UHDBT                        | 3.40            | 2.30-2.65       | S7    |
|                                             | 5.30            | 2.60-3.00       |       |
| <i>Cytochrome b6f</i> (spinach)             | 4.58            | 2.70            | S8    |
|                                             | 3.75            | 2.70            |       |
| <i>Burkholderia cepacia</i>                 | 3.70            | 2.15            | S9    |
|                                             | 4.70            | 3.85            |       |
| <i>B. cepacia</i> AC 1100                   | 3.87            | 2.40            | S10   |
|                                             | 4.90            | 2.32            |       |
| <i>Pseudomonas putida</i>                   | 3.56            | 2.43            | S9    |
|                                             | 4.78            | 2.31            |       |
| <i>Pseudomonas cepacia</i>                  | 4.28            | 2.60            | S11   |
|                                             | 5.49            | 2.30            |       |
| 2,4,5-Trichlorophenoxyacetate Monooxygenase | 3.40            | 2.36            | S10   |
|                                             | 5.10            | 2.52            |       |
| <b>Ferredoxin or ferredoxin-type</b>        |                 |                 |       |
| <i>P. putida</i>                            | 1.11            | 3.27            | S10   |
| <i>Clostridium pasteurianum</i>             | 0.61            | 3.29            | S12   |
| <i>Arum maculatum</i>                       | 1.10            | 3.32            | S6    |
| <i>Spirulina platensis</i>                  | 1.01            | 3.52            | S6    |
| <i>E. coli</i> (reduced)                    | 1.06            | 3.41            | S6    |
| <i>E. coli</i> (oxidized)                   | 1.10            | 3.30            | S13   |
| <i>Porphyra umbilicalis</i>                 | 1.16            | 3.24            | S14   |
|                                             | 0.40            | 3.04            |       |
| <i>Yarrowia lipolytica</i>                  | 0.90            | 3.10            | S15   |
| <i>Adrenodoxin</i>                          | 1.05            | 3.10            | S16   |
|                                             | 0.65            | 2.90            |       |
| <i>Arthrospira plantensis</i> ferredoxin    | 1.16            | 3.10            | S16   |
|                                             | 0.72            | 2.90            |       |

**Table S4.** Cartesian coordinates for the optimized geometries.**(a) Neutral flavin radical**

|   |           |           |           |
|---|-----------|-----------|-----------|
| N | -2.414300 | -0.002840 | -0.350910 |
| C | -3.462390 | -0.897250 | -0.246360 |
| O | -4.627580 | -0.565660 | -0.307690 |
| N | -3.138700 | -2.262240 | -0.051520 |
| C | -1.874220 | -2.791590 | 0.086793  |
| O | -1.632360 | -3.978330 | 0.277746  |
| C | -0.837230 | -1.785230 | -0.022260 |
| N | 0.456424  | -2.186840 | 0.095316  |
| C | 1.504528  | -1.294860 | 0.027977  |
| C | 2.828325  | -1.711820 | 0.191791  |
| C | 3.887589  | -0.817000 | 0.124517  |
| C | 5.303507  | -1.301680 | 0.305671  |
| C | 3.605500  | 0.547178  | -0.111610 |
| C | 4.717485  | 1.562933  | -0.185910 |
| C | 2.283268  | 0.960011  | -0.273760 |
| C | 1.208267  | 0.066410  | -0.215640 |
| N | -0.127170 | 0.473334  | -0.397930 |
| C | -1.171850 | -0.432620 | -0.255420 |
| C | -0.439600 | 1.848180  | -0.819620 |
| C | -0.571960 | 2.888741  | 0.313996  |
| O | -0.743920 | 4.156021  | -0.303730 |
| C | -1.747170 | 2.618377  | 1.259150  |
| O | -2.972070 | 2.721223  | 0.552885  |
| H | -1.750510 | 3.397190  | 2.026123  |
| H | -1.641730 | 1.648105  | 1.758025  |
| H | -1.694010 | 4.220592  | -0.481240 |
| H | 0.356189  | 2.936861  | 0.893044  |
| H | -1.381320 | 1.807795  | -1.363370 |
| H | 0.331908  | 2.182590  | -1.512290 |
| H | 4.326743  | 2.563902  | -0.372580 |
| H | 5.424233  | 1.324163  | -0.987180 |
| H | 5.292986  | 1.596094  | 0.744891  |
| H | 5.331793  | -2.378230 | 0.479685  |
| H | 5.916107  | -1.088840 | -0.576160 |
| H | 5.789284  | -0.812210 | 1.155769  |
| H | 2.093608  | 2.010381  | -0.442460 |
| H | 3.018837  | -2.764480 | 0.374478  |
| H | 0.599304  | -3.178510 | 0.258702  |
| H | -3.923420 | -2.896660 | 0.021065  |
| H | -3.120640 | 1.856585  | 0.129258  |



(b) Anionic flavin radical

|   |           |           |           |
|---|-----------|-----------|-----------|
| N | -2.393210 | 0.005143  | -0.330220 |
| C | -3.448690 | -0.864050 | -0.246410 |
| O | -4.622990 | -0.512970 | -0.312350 |
| N | -3.136460 | -2.216060 | -0.069330 |
| C | -1.870250 | -2.794930 | 0.079038  |
| O | -1.761710 | -4.001410 | 0.255585  |
| C | -0.783340 | -1.820840 | -0.010800 |
| N | 0.493493  | -2.261470 | 0.116041  |
| C | 1.470644  | -1.329430 | 0.038786  |
| C | 2.819761  | -1.727500 | 0.190895  |
| C | 3.885654  | -0.841370 | 0.122710  |
| C | 5.300808  | -1.342940 | 0.294573  |
| C | 3.623364  | 0.525053  | -0.105480 |
| C | 4.742748  | 1.535137  | -0.182030 |
| C | 2.294739  | 0.946729  | -0.259690 |
| C | 1.221315  | 0.057218  | -0.199190 |
| N | -0.113000 | 0.461644  | -0.372360 |
| C | -1.147640 | -0.470040 | -0.234840 |
| C | -0.425130 | 1.816773  | -0.823720 |
| C | -0.560970 | 2.884238  | 0.281675  |
| O | -0.825780 | 4.136787  | -0.353690 |
| C | -1.690840 | 2.586511  | 1.271689  |
| O | -2.940450 | 2.625999  | 0.602347  |
| H | -1.700620 | 3.376591  | 2.029453  |
| H | -1.529180 | 1.625828  | 1.773354  |
| H | -1.782440 | 4.114978  | -0.507490 |
| H | 0.383766  | 2.994508  | 0.823344  |
| H | -1.369170 | 1.768735  | -1.363740 |
| H | 0.347130  | 2.142130  | -1.523370 |
| H | 4.351766  | 2.538702  | -0.364540 |
| H | 5.450330  | 1.305212  | -0.988450 |
| H | 5.328536  | 1.573263  | 0.744996  |
| H | 5.310111  | -2.421890 | 0.461970  |
| H | 5.918142  | -1.136970 | -0.588030 |
| H | 5.802444  | -0.868950 | 1.146720  |
| H | 2.112575  | 2.001270  | -0.423490 |
| H | 2.984989  | -2.785440 | 0.364386  |
| H | -3.921760 | -2.848300 | -0.004520 |
| H | -3.028010 | 1.744914  | 0.171956  |

## Supplementary Figures

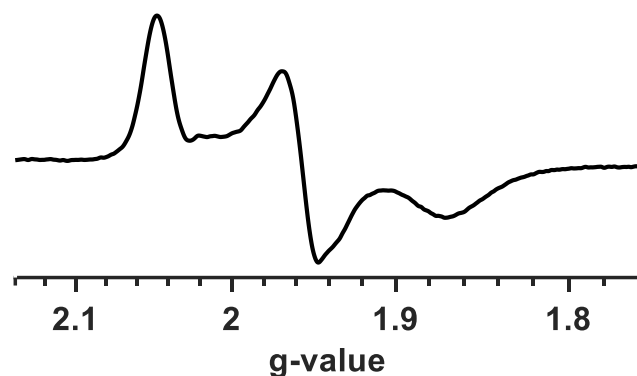

**Fig. S1** X-band CW-EPR spectrum of the reduced MMOR after addition of  $\text{Na}_2\text{S}_2\text{O}_4$  measured at 35 K. The experimental conditions: microwave frequency = 9.64 GHz, microwave power = 1 mW, modulation amplitude = 10 G, modulation frequency = 100 kHz, time constant = 40.96 ms.

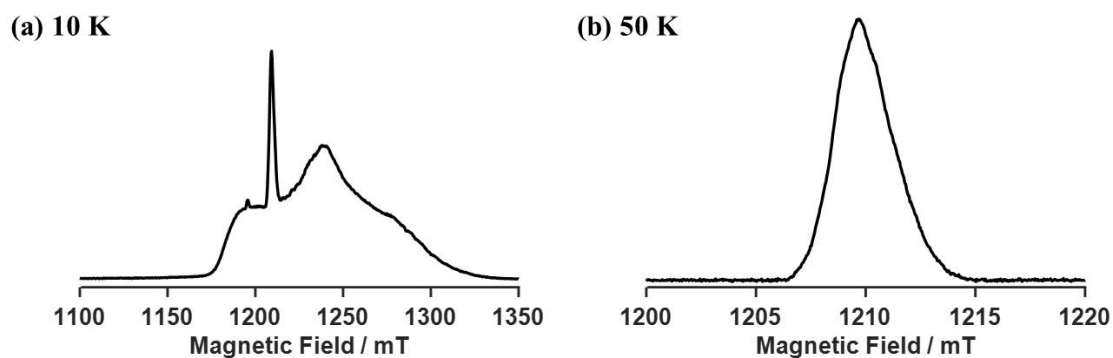

**Fig. S2** Q-band ESE spectra of reduced MMOR at different temperatures. The experimental conditions: microwave frequency = 33.9 GHz, microwave power = 10 dB, pulse sequence =  $\pi/2(32 \text{ ns}) - \tau - \pi(64 \text{ ns})$ ,  $\tau = 300 \text{ ns}$ , temperature = (a) 10 K, (b) 50 K.

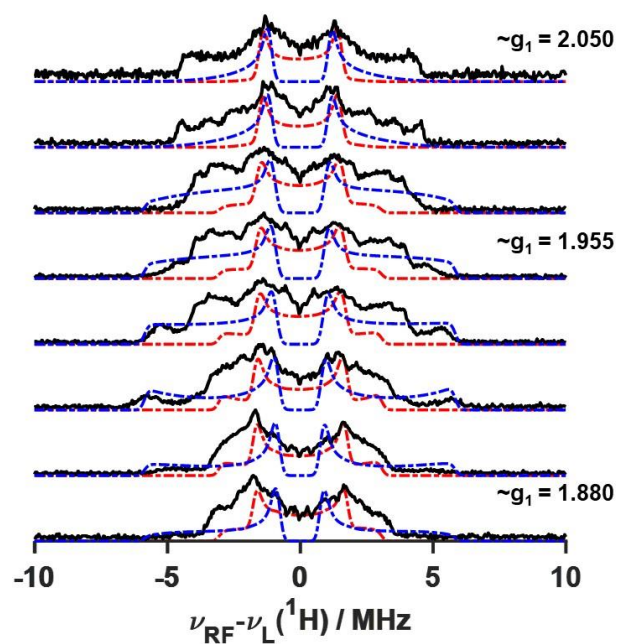

**Figure S3.** Q-band  $^1\text{H}$  Davies ENDOR of  $[2\text{Fe-2S}]^+$  cluster in MMOR (black line) and simulated spectra (dashed red line: exchangeable proton, dashed blue line: non-exchangeable proton). The simulation parameters are shown in table S1. The experimental conditions: microwave frequency = 33.9 GHz,  $\pi/2 = 32$  ns,  $\tau = 300$  ns, RF length = 20  $\mu\text{s}$ , temperature = 10 K.

|                                              |                                               |
|----------------------------------------------|-----------------------------------------------|
| (a) <i>Methylophilus</i><br><i>sporium 5</i> | <sup>39</sup> SCRAGGCATC...L <sup>80</sup> CR |
| <i>Anthrospira</i><br><i>platensis</i>       | <sup>40</sup> SCRAGACSTC...T <sup>79</sup> CV |

(b)

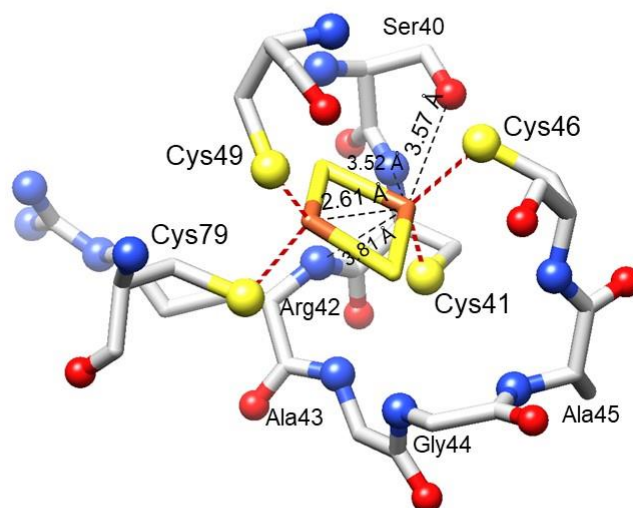

*Anthrospira platensis*

PDB ID: 4FXC

**Figure S4.** (a) Amino acid sequences of residues located around the  $[2\text{Fe}-2\text{S}]^+$  cluster of *Methylophilus sporium 5* and *Anthrospira platensis*, and the immediate environment of the  $[2\text{Fe}-2\text{S}]^+$  cluster of the ferredoxin of (b) *Anthrospira platensis* with selected bond distances of Fe–Fe and proximal H...Fe. Note that the positions of protons in the ferredoxin domain of *Anthrospira platensis* were not well resolved by X-ray crystallography. Color code: orange, Fe; yellow, S; red, O; blue, N; gray, C; white, H.

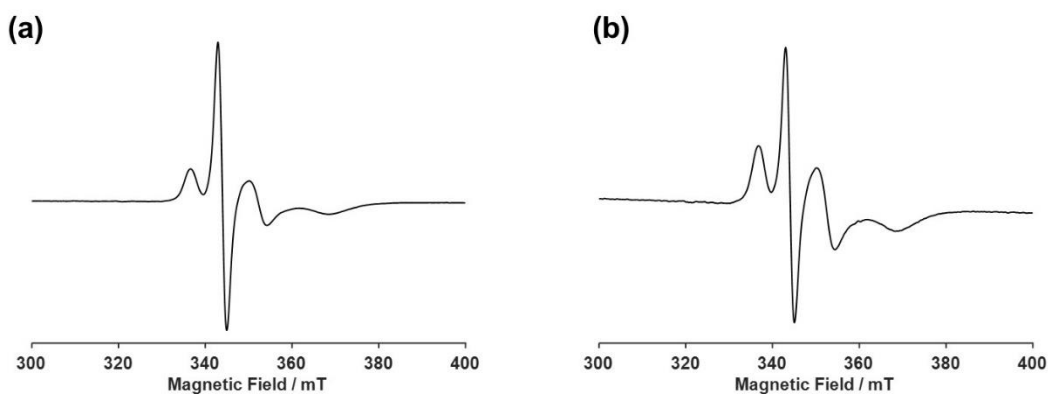

**Figure S5.** CW-EPR spectra of MMOR (a) and MMOR+MMOB (b). The experimental conditions: microwave frequency = 9.64 GHz, microwave power = 1 mW, modulation amplitude = 10 G, modulation frequency = 100 kHz, time constant = 40.96 ms, temperature = 35 K.

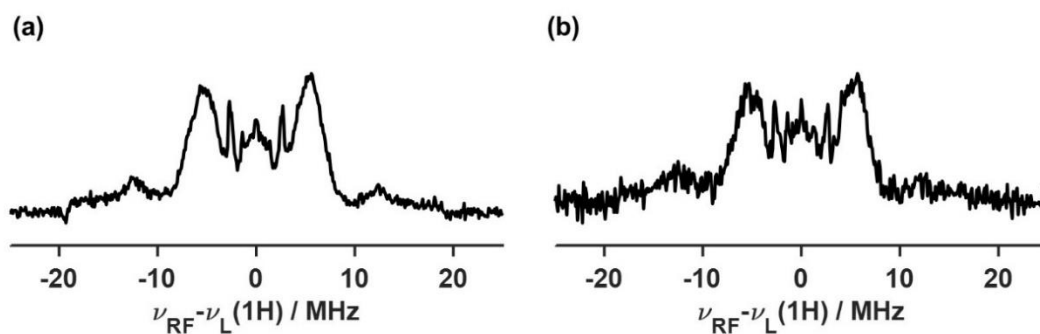

**Figure S6.** 34 GHz  $^1\text{H}$  Davies ENDOR of neutral flavin radical species in (a) MMOR and (b) MMOR+MMOB. The experimental conditions: microwave frequency = 33.9 GHz, Pulse sequence = 64 ns-32 ns-64 ns ( $\pi$ - $\pi/2$ - $\pi$ ),  $\tau$  = 300 ns, RF length = 20  $\mu\text{s}$ , temperature = 50 K.

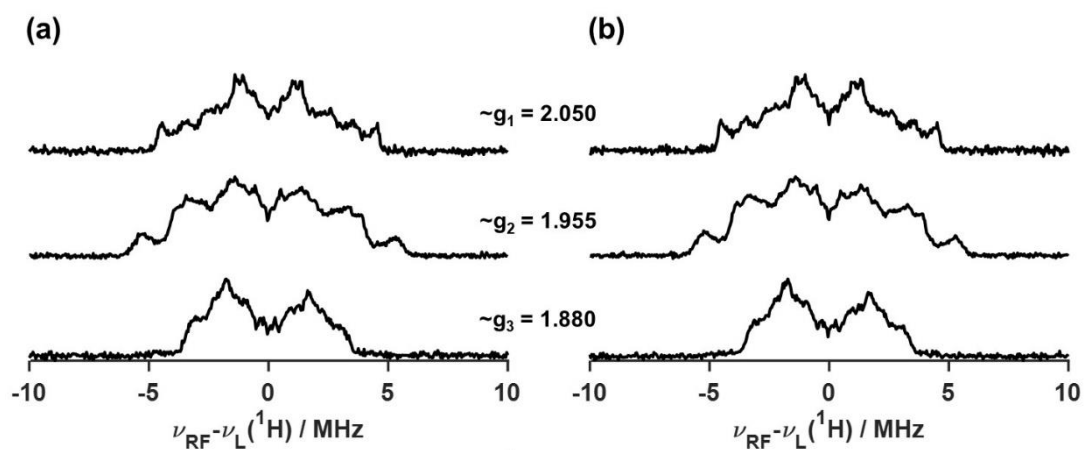

**Figure S7.** 34 GHz  $^1\text{H}$  Davies-ENDOR of  $[\text{2Fe-2S}]^+$  cluster in (a) MMOR and (b) MMOR+MMOB. The experimental conditions: microwave frequency = 33.9 GHz,  $\pi = 64$  ns,  $\pi/2 = 32$  ns,  $\tau = 300$  ns, RF length = 20  $\mu\text{s}$ , temperature = 10 K.

## References

- (S1) A. Bencini and D. Gatteschi, Electron paramagnetic resonance of exchange coupled systems, *Springer Verlag: Berlin*, 1990.
- (S2) M.-E. Pandelia, N. D. Lanz, S. J. Booker and C. Krebs, Mössbauer spectroscopy of Fe/S proteins, *Biochim. Biophys. Acta*, 2015, **1853**, 1395-1405.
- (S3) R. Fiege, W. Zweggart, R. Bittl, N. Adir, G. Renger and W. Lubitz, EPR and ENDOR studies of the water oxidizing complex of Photosystem II, *Photosynth. Res.*, 1996, **48**, 227-237.
- (S4) D. W. Randall, A. Gelasco, M. T. Caudle, V. L. Pecoraro and R. D. Britt, ESE-ENDOR and ESEEM characterization of water and methanol ligation to a dinuclear Mn(III)Mn(IV) complex, *J. Am. Chem. Soc.*, 1997, **119**, 4481-4491.
- (S5) J. Müller, A. A. Lugovskoy, G. Wagner and S. J. Lippard, NMR structure of the [2Fe-2S] ferredoxin domain from soluble methane monooxygenase reductase and interaction with its hydroxylase, *Biochemistry*, 2002, **41**, 42-51.
- (S6) J. K. Shergill and R. Cammack, ESEEM and ENDOR studies of the Rieske iron-sulphur protein in bovine heart mitochondrial membranes, *Biochim. Biophys. Acta*, 1994, **1185**, 35-42.
- (S7) R. D. Britt, K. Sauer and M. P. Klein, Electron spin echo envelope modulation spectroscopy supports the suggested coordination of two histidine ligands to the Rieske Fe-S centers of the cytochrome *b<sub>6</sub>f* complex of spinach and the cytochrome *bc<sub>1</sub>* complexes of *Rhodospirillum rubrum*, *Rhodobacter sphaeroides* R-26, and bovine heart mitochondria, *Biochemistry*, 1991, **30**, 1892-1901.
- (S8) A. Riedel, S. Fetzner, M. Rampp, F. Lingens, U. Liebl, J. Zimmermann and W. Nitschke, EPR, electron spin echo envelope modulation, and electron nuclear double resonance studies of the 2Fe-2S centers of the 2-halobenzoate 1,2-dioxygenase from *Burkholderia (Pseudomonas) cepacia* 2CBS, *J. Biol. Chem.*, 1995, **270**, 30869-30873.
- (S9) R. J. Gurbiel, C. J. Batie, M. Sivaraja, A. E. True, J. A. Fee, B. M. Hoffman and D. P. Ballou, Electron-nuclear double resonance spectroscopy of <sup>15</sup>N-enriched phthalate dioxygenase from *Pseudomonas cepacia* proves that two histidines are coordinated to the [2Fe-2S] Rieske-type clusters, *Biochemistry*, 1989, **28**, 4861-4871.
- (S10) J. K. Shergill, C. L. Joannou, J. R. Mason and R. Cammack, Coordination of the Rieske-type [2Fe-2S] cluster of the terminal iron—sulfur protein of *Pseudomonas putida* benzene 1,2-dioxygenase, studied by one- and two-dimensional electron spin-echo envelope modulation spectroscopy, *Biochemistry*, 1995, **34**, 16533-16542.
- (S11) S. A. Dikanov, R. M. Davydov, L. Xun and M. K. Bowman, CW and pulsed EPR characterization of the reduction of the Rieske-Type iron—sulfur cluster in 2,4,5-trichlorophenoxyacetate monooxygenase, *J. Magn. Reson.*, 1996, **112**, 289-294.
- (S12) J. K. Shergill, M. Golinelli, R. Cammack and J. Meyer, Coordination of the [2Fe-2S] cluster in wild type and molecular variants of *Clostridium pasteurianum* ferredoxin, investigated by ESEEM spectroscopy, *Biochemistry*, 1996, **35**, 12842-12848.
- (S13) R. Cammack and A. Chapman, Electron spin-echo spectroscopy of the iron-sulphur clusters of xanthine oxidase from milk, *J. Chem. Soc. Faraday Trans*, 1991, **87**, 3203-3206.

- (S14) S. A. Dikanov, A. M. Tyryshkin, I. Felli, E. J. Reuser and J. Hüttermann, C-Band ESEEM of strongly coupled peptide nitrogens in reduced two-iron ferredoxin, *J. Magn. Reson.*, 1995, **108**, 99-102.
- (S15) T. Maly, L. Gregic, K. Zwicker, V. Zickermann, U. Brandt and T. Prisner, Cluster N1 of complex I from *Yarrowia lipolytica* studied by pulsed EPR spectroscopy, *J. Biol. Inorg. Chem.*, 2006, **11**, 343-350.
- (S16) S. A. Dikanov, R. I. Samoilova, R. Kappl, A. R. Crofts and J. Hüttermann, The reduced [2Fe-2S] clusters in adrenodoxin and *Arthrospira platensis* ferredoxin share spin density with protein nitrogens, probed using 2D ESEEM, *Phys. Chem. Chem. Phys.*, 2009, **11**, 6807-6819.
